# Supplementary material for: In-Hospital Mortality Outcomes of ST-Segment Elevation Myocardial Infarction: A Cross-Sectional Study from a Tertiary Academic Hospital in Johannesburg, South Africa
Source: MDPI journal article supplement (doi:10.3390/jcdd10080348), 2023-08-15
Supplement: s1 [file s1]

Supplementary file

### **UNIVARIABLE LOGISTIC REGRESSION MODEL (NO ADJUSTMENT FOR CONFOUNDERS)**

Variables with a p-value < 0.1 on the Pearson's chi-square test, Wilcoxon ranksum test or Students' t-test:

logit mortality age, or nolog

logit mortality chestpain\_cath, or nolog

logit mortality systolic, or nolog

logit mortality diastolic, or nolog

logit mortality troponin, or nolog

logit mortality ck\_mb, or nolog

logit mortality sodium, or nolog

logit mortality potassium, or nolog

logit mortality urea, or nolog

logit mortality creatinine , or nolog

logit mortality egfr, or nolog

logit mortality i.nyha1, or nolog

logit mortality i.nyha\_class2, or nolog

logit mortality i.nyha\_class3, or nolog

logit mortality i.nyha\_class4, or nolog

logit mortality i.killip\_class1, or nolog

logit mortality i.killip\_class2, or nolog

logit mortality i.killip\_class3, or nolog

logit mortality i.killip\_class4, or nolog

logit mortality i.sinus, or nolog

logit mortality i.ventrfib , or nolog

logit mortality i.heartblock , or nolog

logit mortality ecg\_rate, or nolog

logit mortality i.anterior\_MI , or nolog

logit mortality i.nolesion,or nolog

logit mortality i.dobutamine,or nolog

logit mortality i.adrenaline,or nolog

logit mortality i.phenylephrine ,or nolog

logit mortality i.pacing ,or nolog

logit mortality i.pci\_rca, or nolog

logit mortality i.haemodynamic\_instability ,or nolog

logit mortality i.Group1\_pharmaco\_invasive ,or nolog

The following variables were omitted in the multivariable model due to collinearity. These variables were identified based on a inflated odds ratio, high standard error or wide confidence interval.

1. Inotropes
2. Creatinine
3. Complete heart block
4. Ventricular fibrillation
5. Sinus rhythm
6. NYHA class 4
7. Killip class 3
8. Killip class 4
9. Phenylephrine
10. Haemodynamic\_instability
11. Dobutamine
12. Adrenaline
13. Pacing
14. Anterior myocardial infarction
15. No lesion (normal coronary angiography)

The following variables were removed by Stata, the statistical analysis software:

1. CKMB: "ck\_mb > 211.3 predicts data perfectly"
2. NYHA class 1: "predicts death perfectly"

## **FINAL MULTIVARIABLE REGRESSION MODEL**

1. Unadjusted (crude odds ratio):

logistic mortality systolic diastolic troponin sodium potassium urea egfr i.killip\_class1 ecg\_rate  
i.pci\_rca i.Group1\_pharmaco\_invasive

2. Adjusted for age and sex:

logistic mortality age sex systolic diastolic troponin sodium potassium urea egfr i.killip\_class1  
ecg\_rate i.pci\_rca i.Group1\_pharmaco\_invasive
